# Supplementary material for: Genomic evidence of local adaptation in Scottish Margaritifera margaritifera
Source: Research Square preprint supplement (doi:10.21203/rs.3.rs-7363533/v1), 2025-09-04
Supplement: Supplementary file 1 [file 6b3570a0fe9570a206c0c547.docx]

# Supplementary Materials:

| 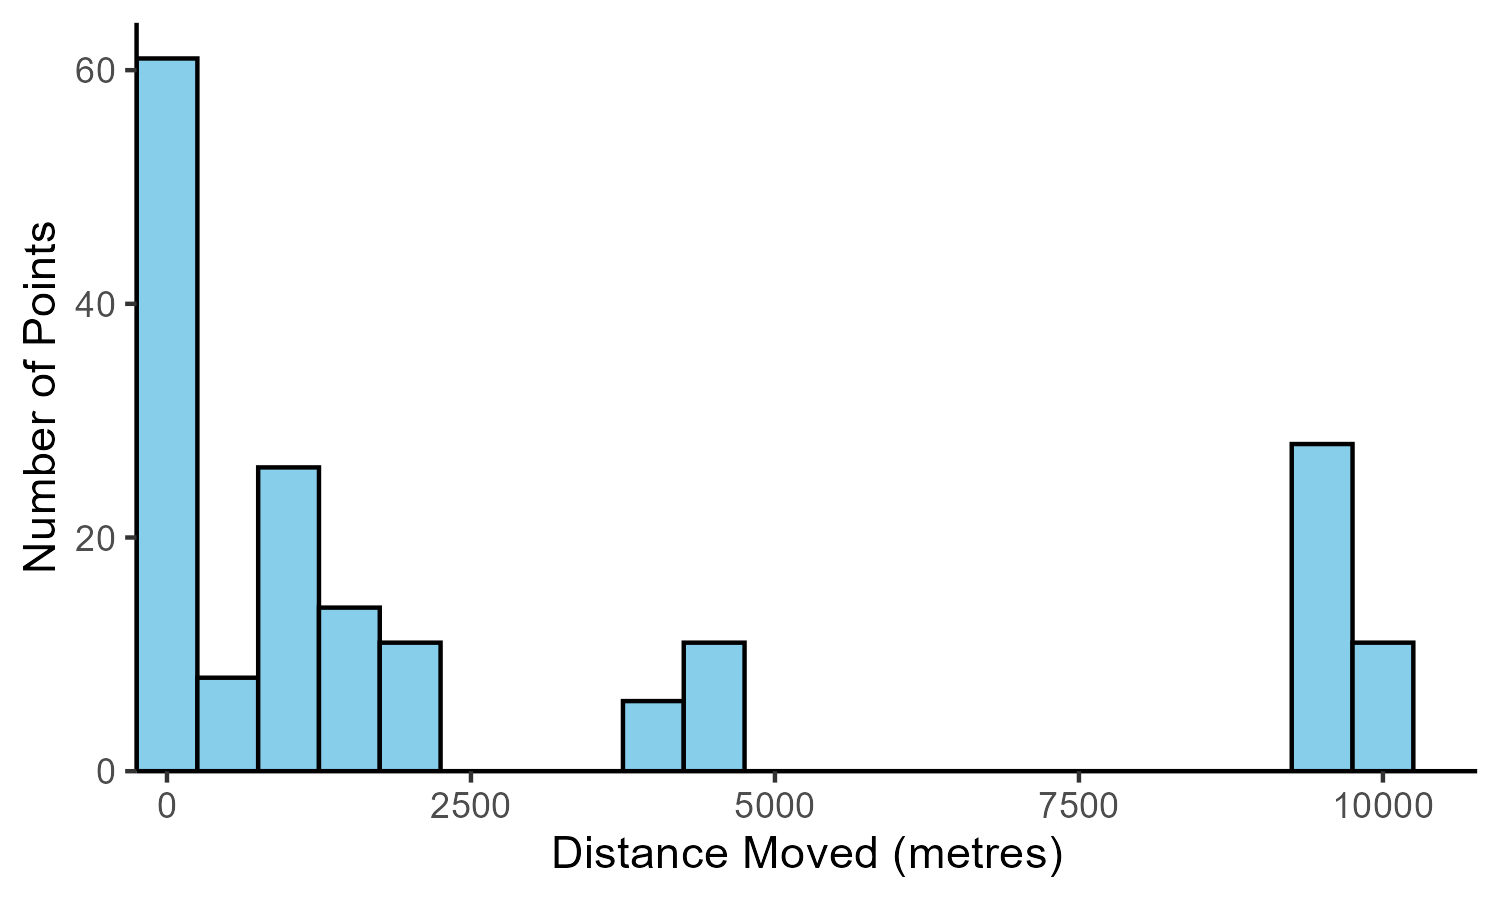  Figure S1. Distribution of distances points were moved to intersect with river data raster. Maximum distance was 10,050m. |
| --- |

| 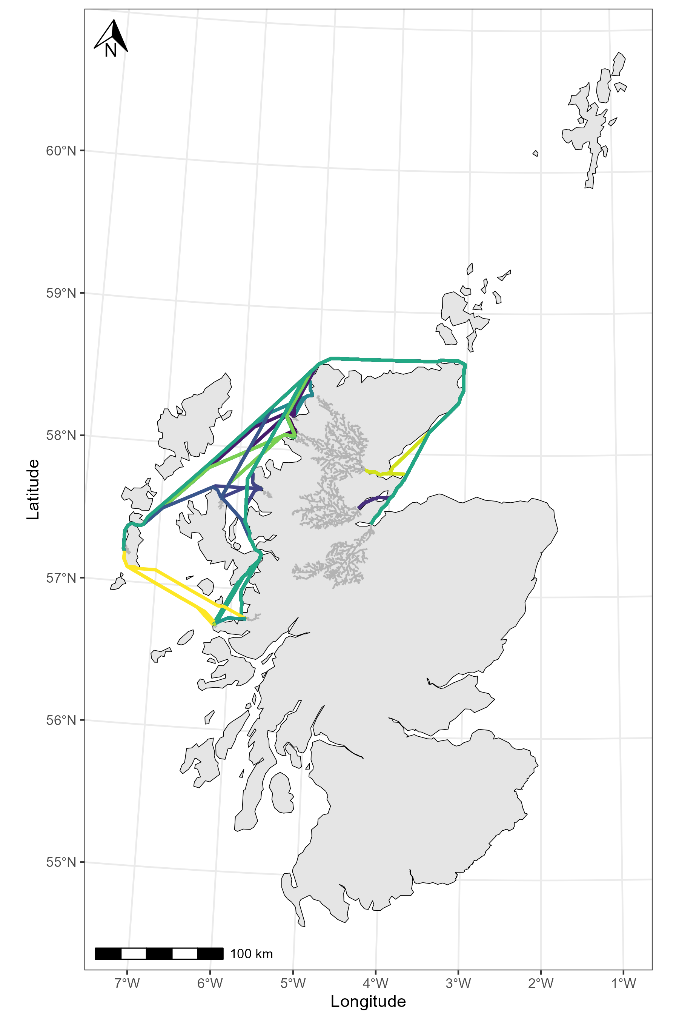  Figure S2. Visualisation of the least-cost paths between sampled *Margaritifera margaritifera* populations in population genomic analysis. Final measurement of least-cost path includes from sampling location to river mouth. Specific locations of mussels are sensitive due to the risk of pearl-fishing therefore the full river network for each population is depicted here. |
| --- |
| 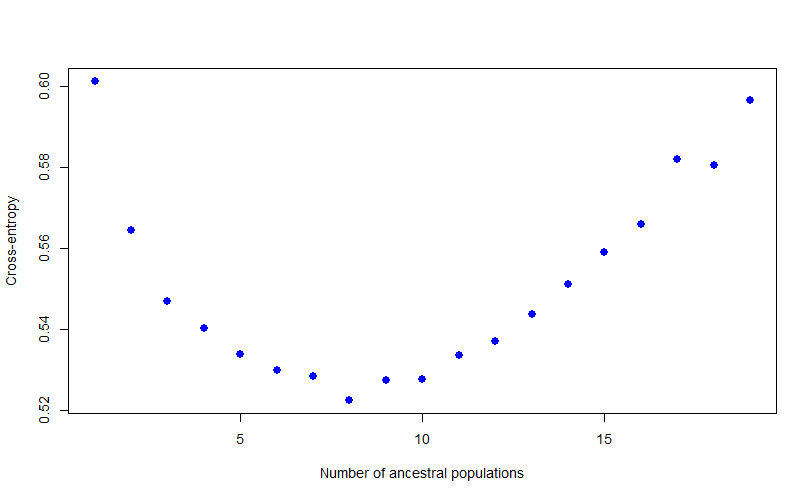  Figure S3. Cross-entropy for sparse non-negative matrix factorisation of 3456 SNPs pruned for linkage-disequilibrium from 156 freshwater pearl mussels collected across Scotland. |
| 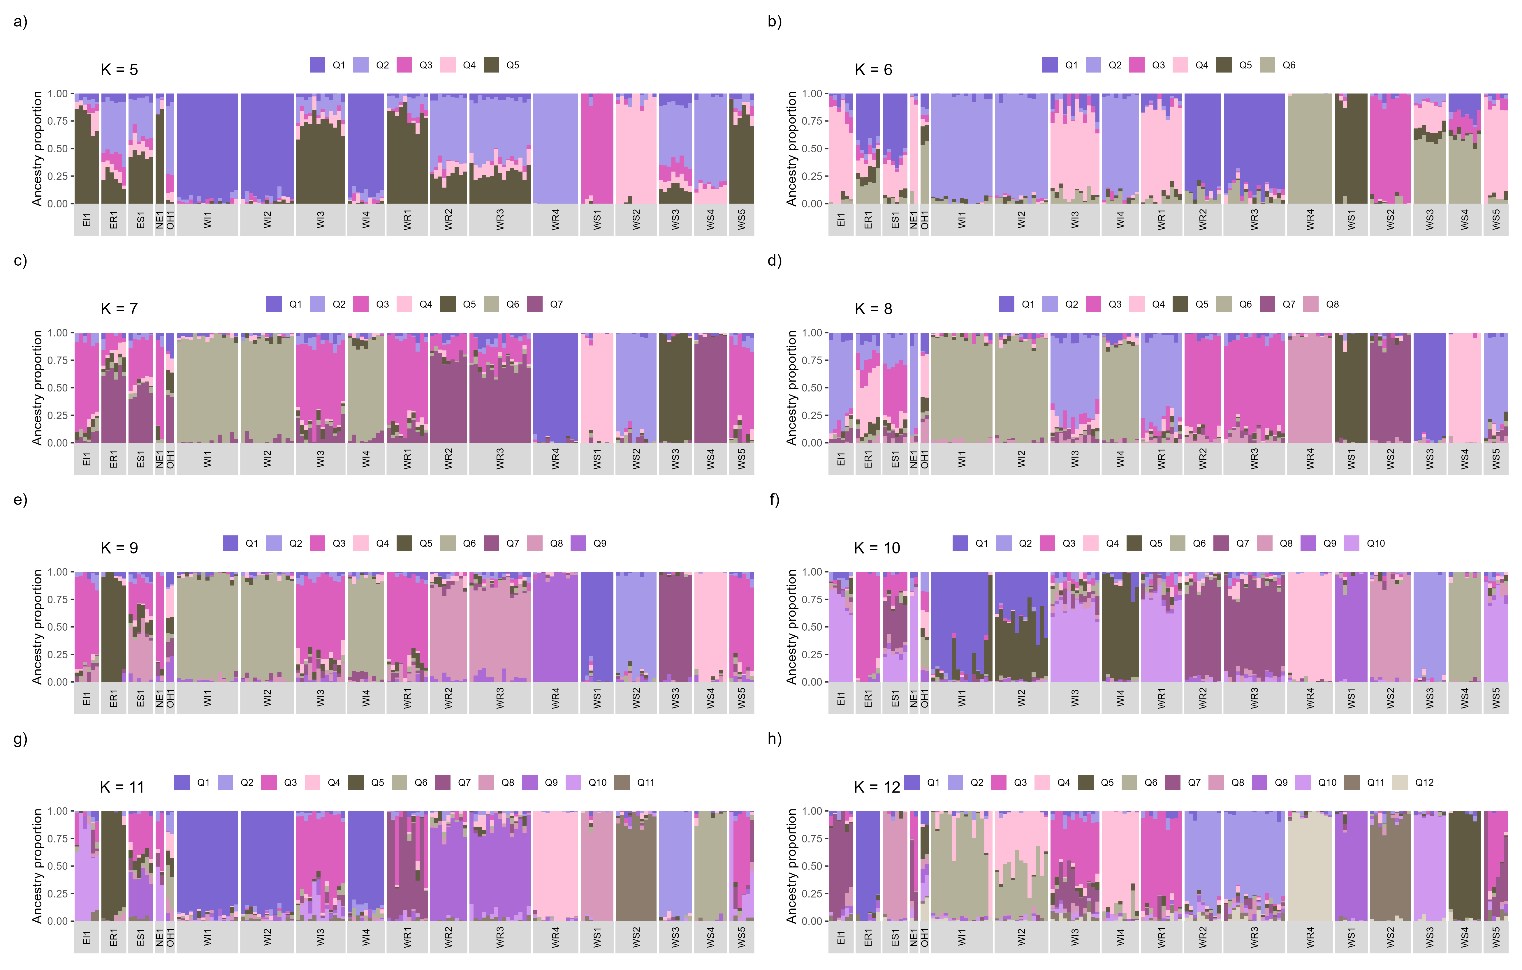  Figure S4. Individual ancestry proportions (N=156 *Margaritifera margaritifera,* 3456 SNPs) calculated by sparse non-negative matrix factorisation, where each bar represents an individual and colour represents ancestry makeup. K=9 had the lowest cross-entropy value of 0.526 (range: 0. 520-0. 538). Individuals are clustered into populations dependant on sampling location. Population names are anonymised by vice-county to retain confidentiality of the specific site. Vice counties are: East Inverness-shire (EI); East Ross (ER); East Sutherland (ES); North Ebudes (NE); Outer Hebrides (OH); West Inverness-shire (WI); West Ross (WR); West Sutherland (WS). |
| 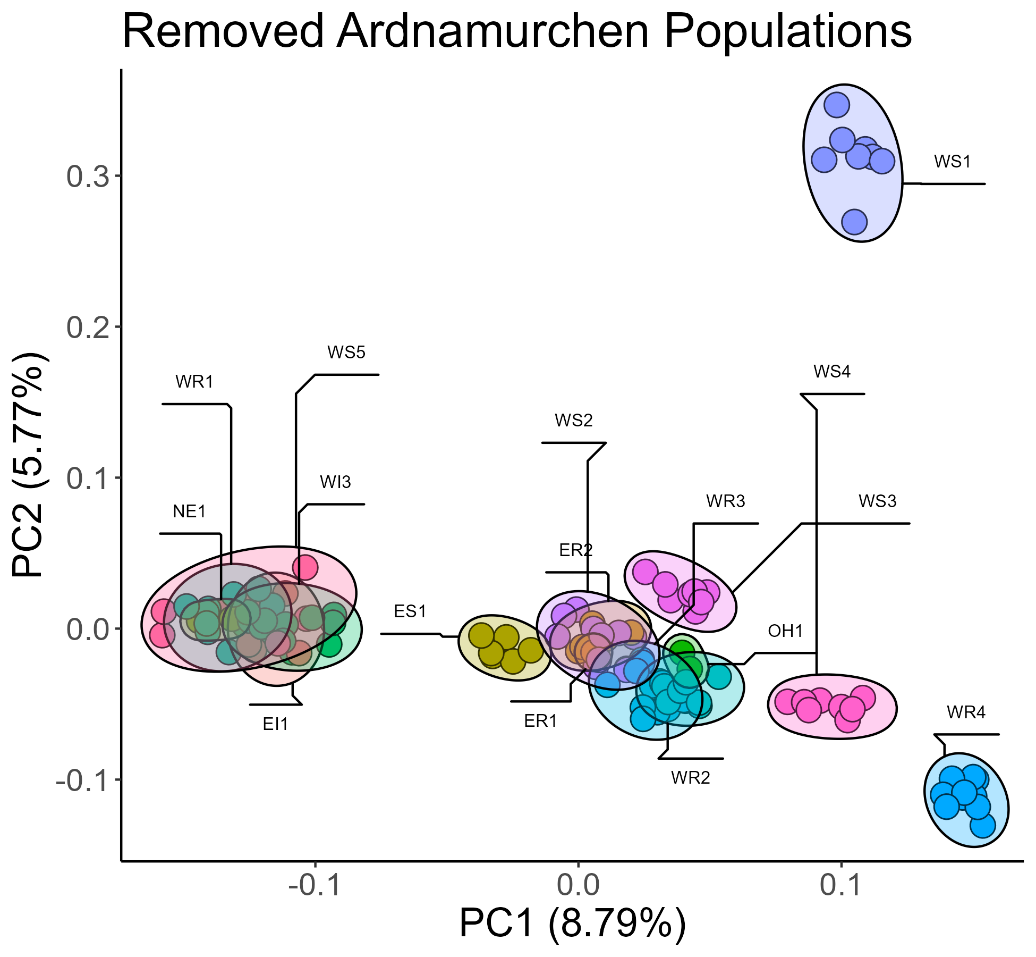  Figure S5. Subset West Inverness-shire populations out of the PCA. |
| ~~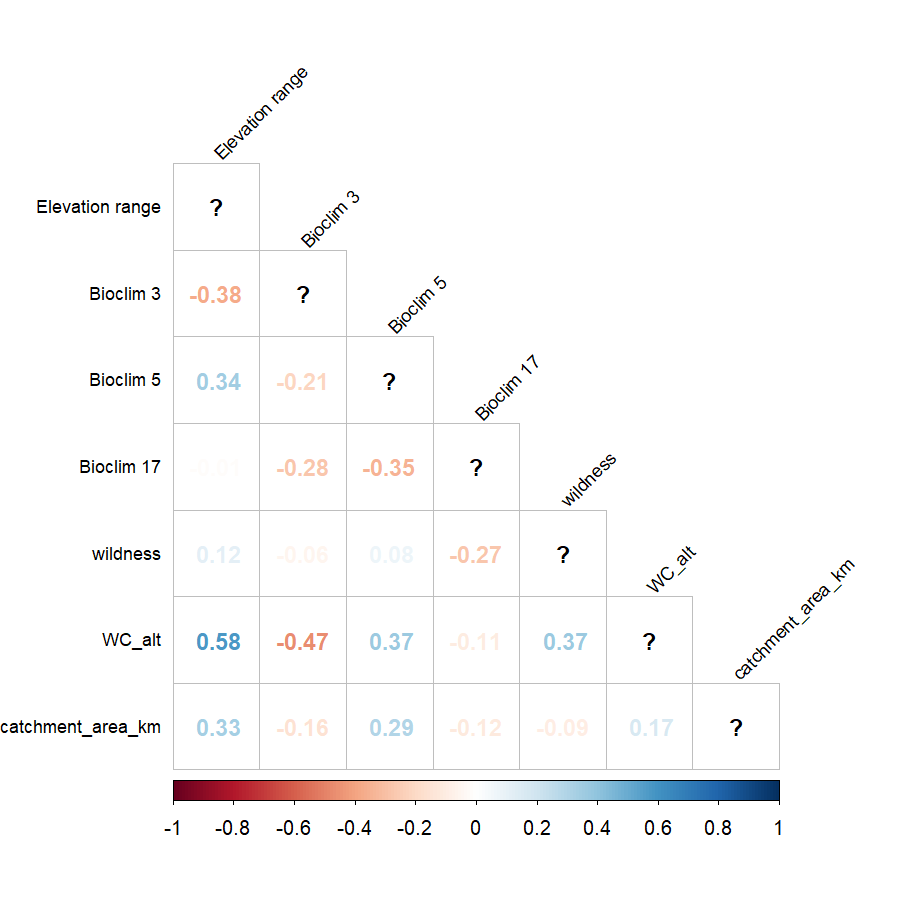~~  Figure S6. Correlations of predictor variables used in redundancy analysis based on 5486 SNPs across 156 individual *Margaritifera margaritifera* in Scotland. RDA equation as follows: rda(SNPs ~ elevation range + catchment area + wildness + altitude +BIOCLIM3 (Isothermality, calculated as BIOCLIM2/BIOCLIM7 × 100) + BIOCLIM5 (maximum temperature of the warmest month) + BIOCLIM17 (precipitation of the driest quarter) +Condition(Host). |
| ~~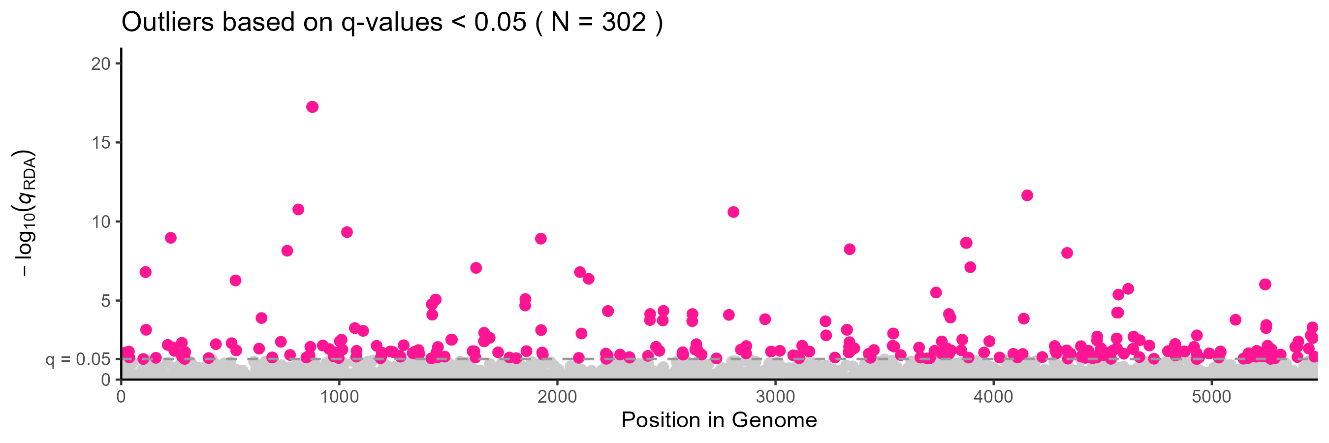~~  Figure S7. Genome-wide distribution of SNPs along the x-axis and -log10(q.values) from redundancy analysis based on 5486 SNPs across 156 individual *Margaritifera margaritifera* in Scotland. RDA equation as follows: rda(SNPs ~ elevation range + catchment area + wildness + altitude +BIOCLIM3 (Isothermality, calculated as BIOCLIM2/BIOCLIM7 × 100) + BIOCLIM5 (maximum temperature of the warmest month) + BIOCLIM17 (precipitation of the driest quarter) +Condition(Host). Grey dots represent neutral SNPs whereas pink dots represent 302 outlier SNPs with q-values <0.05, in other words a false positive rate of 5%. Grey dotted line is at q=0.05. |

| 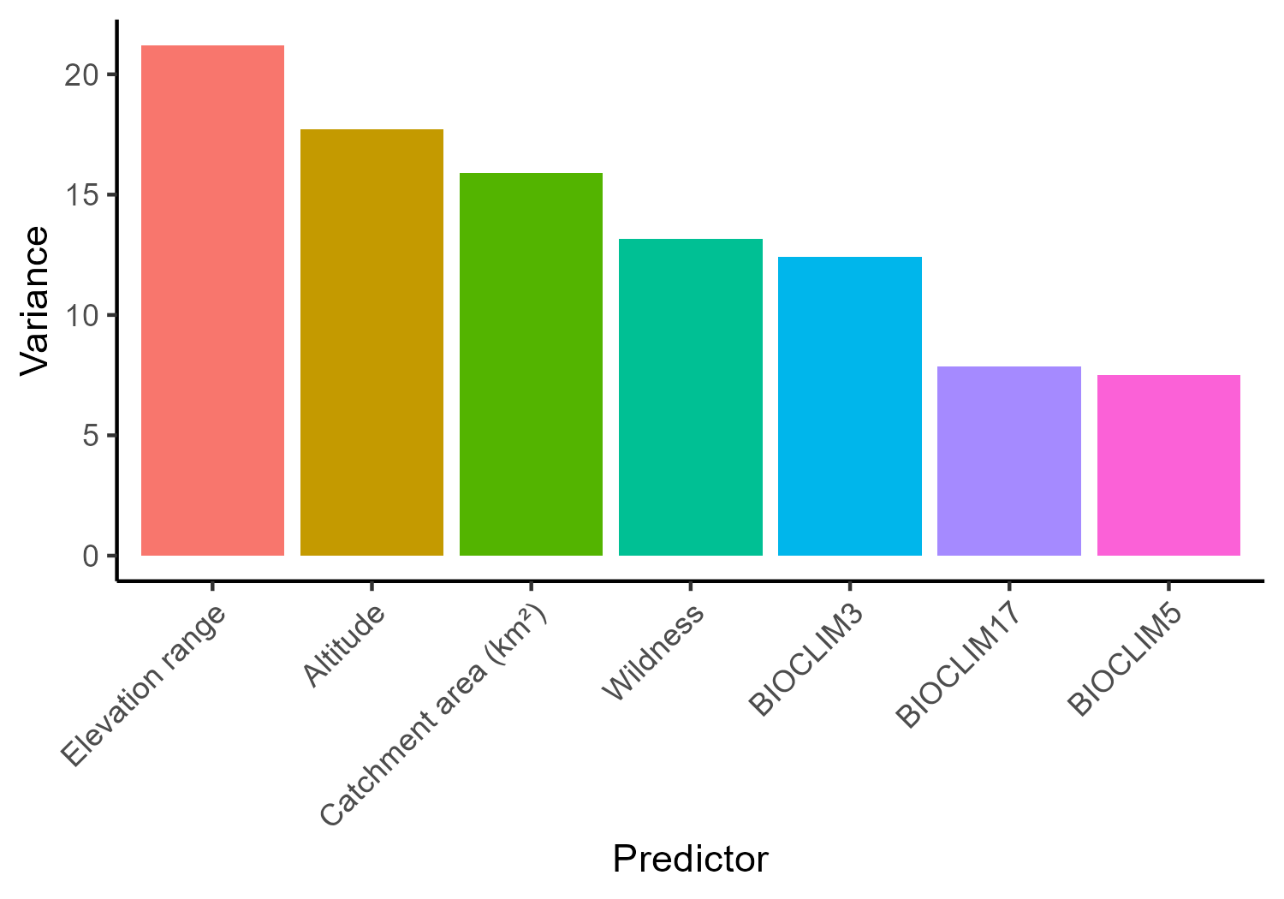  Figure S8. Proportional variance explained by terms in an RDA model based on 302 outlier SNPs across 156 individuals *Margaritifera margaritifera* in Scotland. RDA equation as follows: rda(outlier.SNPs ~ elevation range + catchment area + wildness + altitude +BIOCLIM3 (Isothermality, calculated as BIOCLIM2/BIOCLIM7 × 100) + BIOCLIM5 (maximum temperature of the warmest month) + BIOCLIM17 (precipitation of the driest quarter) +Condition(Host) |
| --- |

| Population | Q1 | Q2 | Q3 | Q4 | Q5 | Q6 | Q7 | Q8 | Q9 | Ancestry >75% |
| --- | --- | --- | --- | --- | --- | --- | --- | --- | --- | --- |
| EI1 | 0.67 | 3.56 | 3.05 | 2.40 | 5.44 | 1.61 | 0.85 | **76.8** | 5.60 | Q8 |
| ER1 | 0.71 | 0.01 | 1.22 | 1.92 | 0.01 | 1.94 | **93.44** | 0.01 | 0.74 | Q7 |
| ES1 | 1.95 | 1.44 | 0.9 | 4.11 | **42.31** | 1.80 | 16.64 | 24.53 | 6.32 | Mixed |
| NE1 | 1.61 | 2.02 | 5.84 | 0.01 | 1.72 | 0.01 | 4.1 | **84.25** | 0.44 | Q8 |
| OH1 | 22.29 | 4.57 | 15.51 | 12.98 | 1.21 | **24.64** | 15.46 | 0.01 | 3.32 | Mixed |
| WI1 | 1.33 | **92.93** | 0.57 | 1.4 | 1.44 | 0.71 | 1.14 | 0.26 | 0.21 | Q2 |
| WI2 | 0.65 | **91.2** | 1.43 | 1.01 | 1.07 | 2.29 | 0.81 | 0.39 | 1.14 | Q2 |
| WI3 | 3.75 | 2.03 | 4.12 | 1.29 | 3.93 | 5.19 | 4.88 | **69.81** | 5.00 | Mixed |
| WI4 | 0.72 | **86.17** | 4.65 | 1.77 | 1.72 | 2.50 | 0.29 | 0.51 | 1.65 | Q2 |
| WR1 | 1.67 | 1.36 | 3.90 | 3.43 | 4.83 | 2.53 | 3.02 | **77.58** | 1.69 | Q8 |
| WR2 | 4.15 | 0.30 | 2.74 | 2.28 | **83.00** | 3.96 | 1.68 | 0.79 | 1.10 | Q5 |
| WR3 | 4.33 | 1.90 | 2.02 | 2.06 | **81.11** | 2.05 | 2.09 | 2.23 | 2.20 | Q5 |
| WR4 | **96.67** | 0.03 | 0.33 | 0.43 | 0.83 | 0.51 | 0.39 | 0.41 | 0.40 | Q1 |
| WS1 | 0.87 | 0.29 | 0.37 | **95.48** | 0.01 | 1.14 | 0.04 | 0.78 | 1.02 | Q4 |
| WS2 | 1.27 | 1.46 | 0.46 | 1.12 | 1.43 | 0.32 | 2.03 | 0.33 | **91.59** | Q9 |
| WS3 | 1.37 | 0.26 | **95.76** | 0.51 | 0.14 | 0.35 | 1.15 | 0.35 | 0.11 | Q3 |
| WS4 | 1.01 | 0.92 | 0.07 | 0.29 | 1.09 | **95.35** | 0.69 | 0.06 | 0.52 | Q6 |
| WS5 | 0.77 | 2.21 | 1.96 | 2.33 | 1.78 | 1.84 | 1.2 | **80.72** | 7.19 | Q8 |

Table S1. Averaged ancestry proportions for each population calculated by sparse non-negative matrix factorisation for N=156 *Margarifiera margaritifera,* 3456 SNPs. K=9 had the lowest cross-entropy value of 0.526 (range: 0. 520-0. 538). Population names are anonymised by vice-county to retain confidentiality of the specific site. Vice counties are as follows: East Inverness-shire (EI); East Ross (ER); East Sutherland (ES); North Ebudes (NE); Outer Hebrides (OH); West Inverness-shire (WI); West Ross (WR); West Sutherland (WS).

| 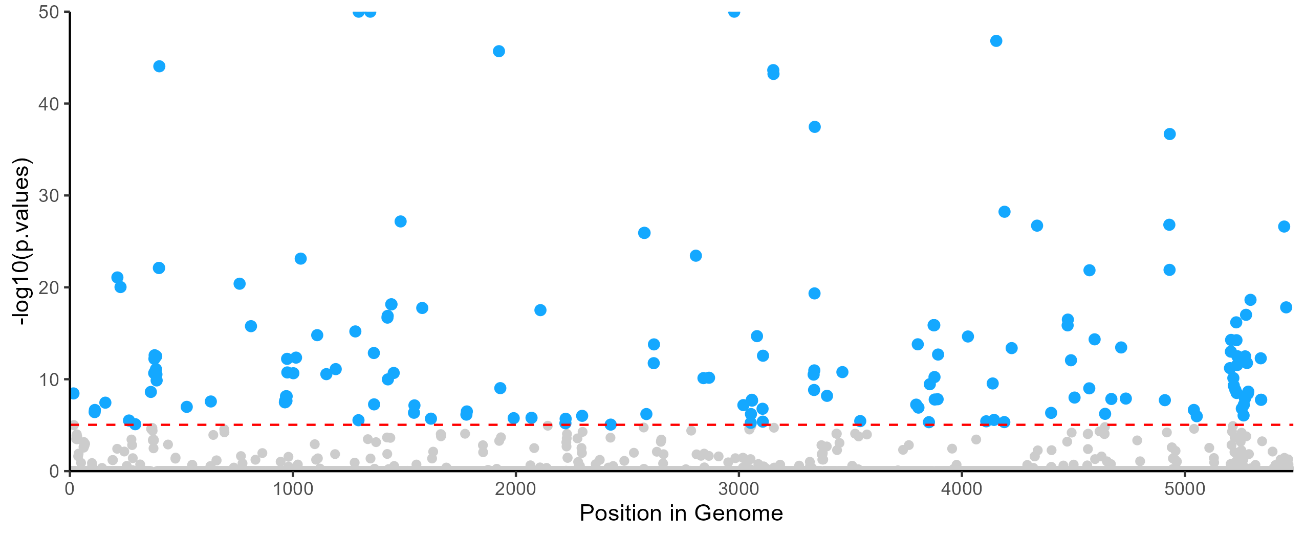  Figure S9. 5486 single nucleotide polymorphisms (SNPs) from Scottish *Margaritifera margaritifera* against *pcadapt* (Luu et al. 2017) generated p-values. SNPs are highlighted in blue if they are over a Bonferroni adjusted threshold of 0.05 (red dashed line). |
| --- |

| 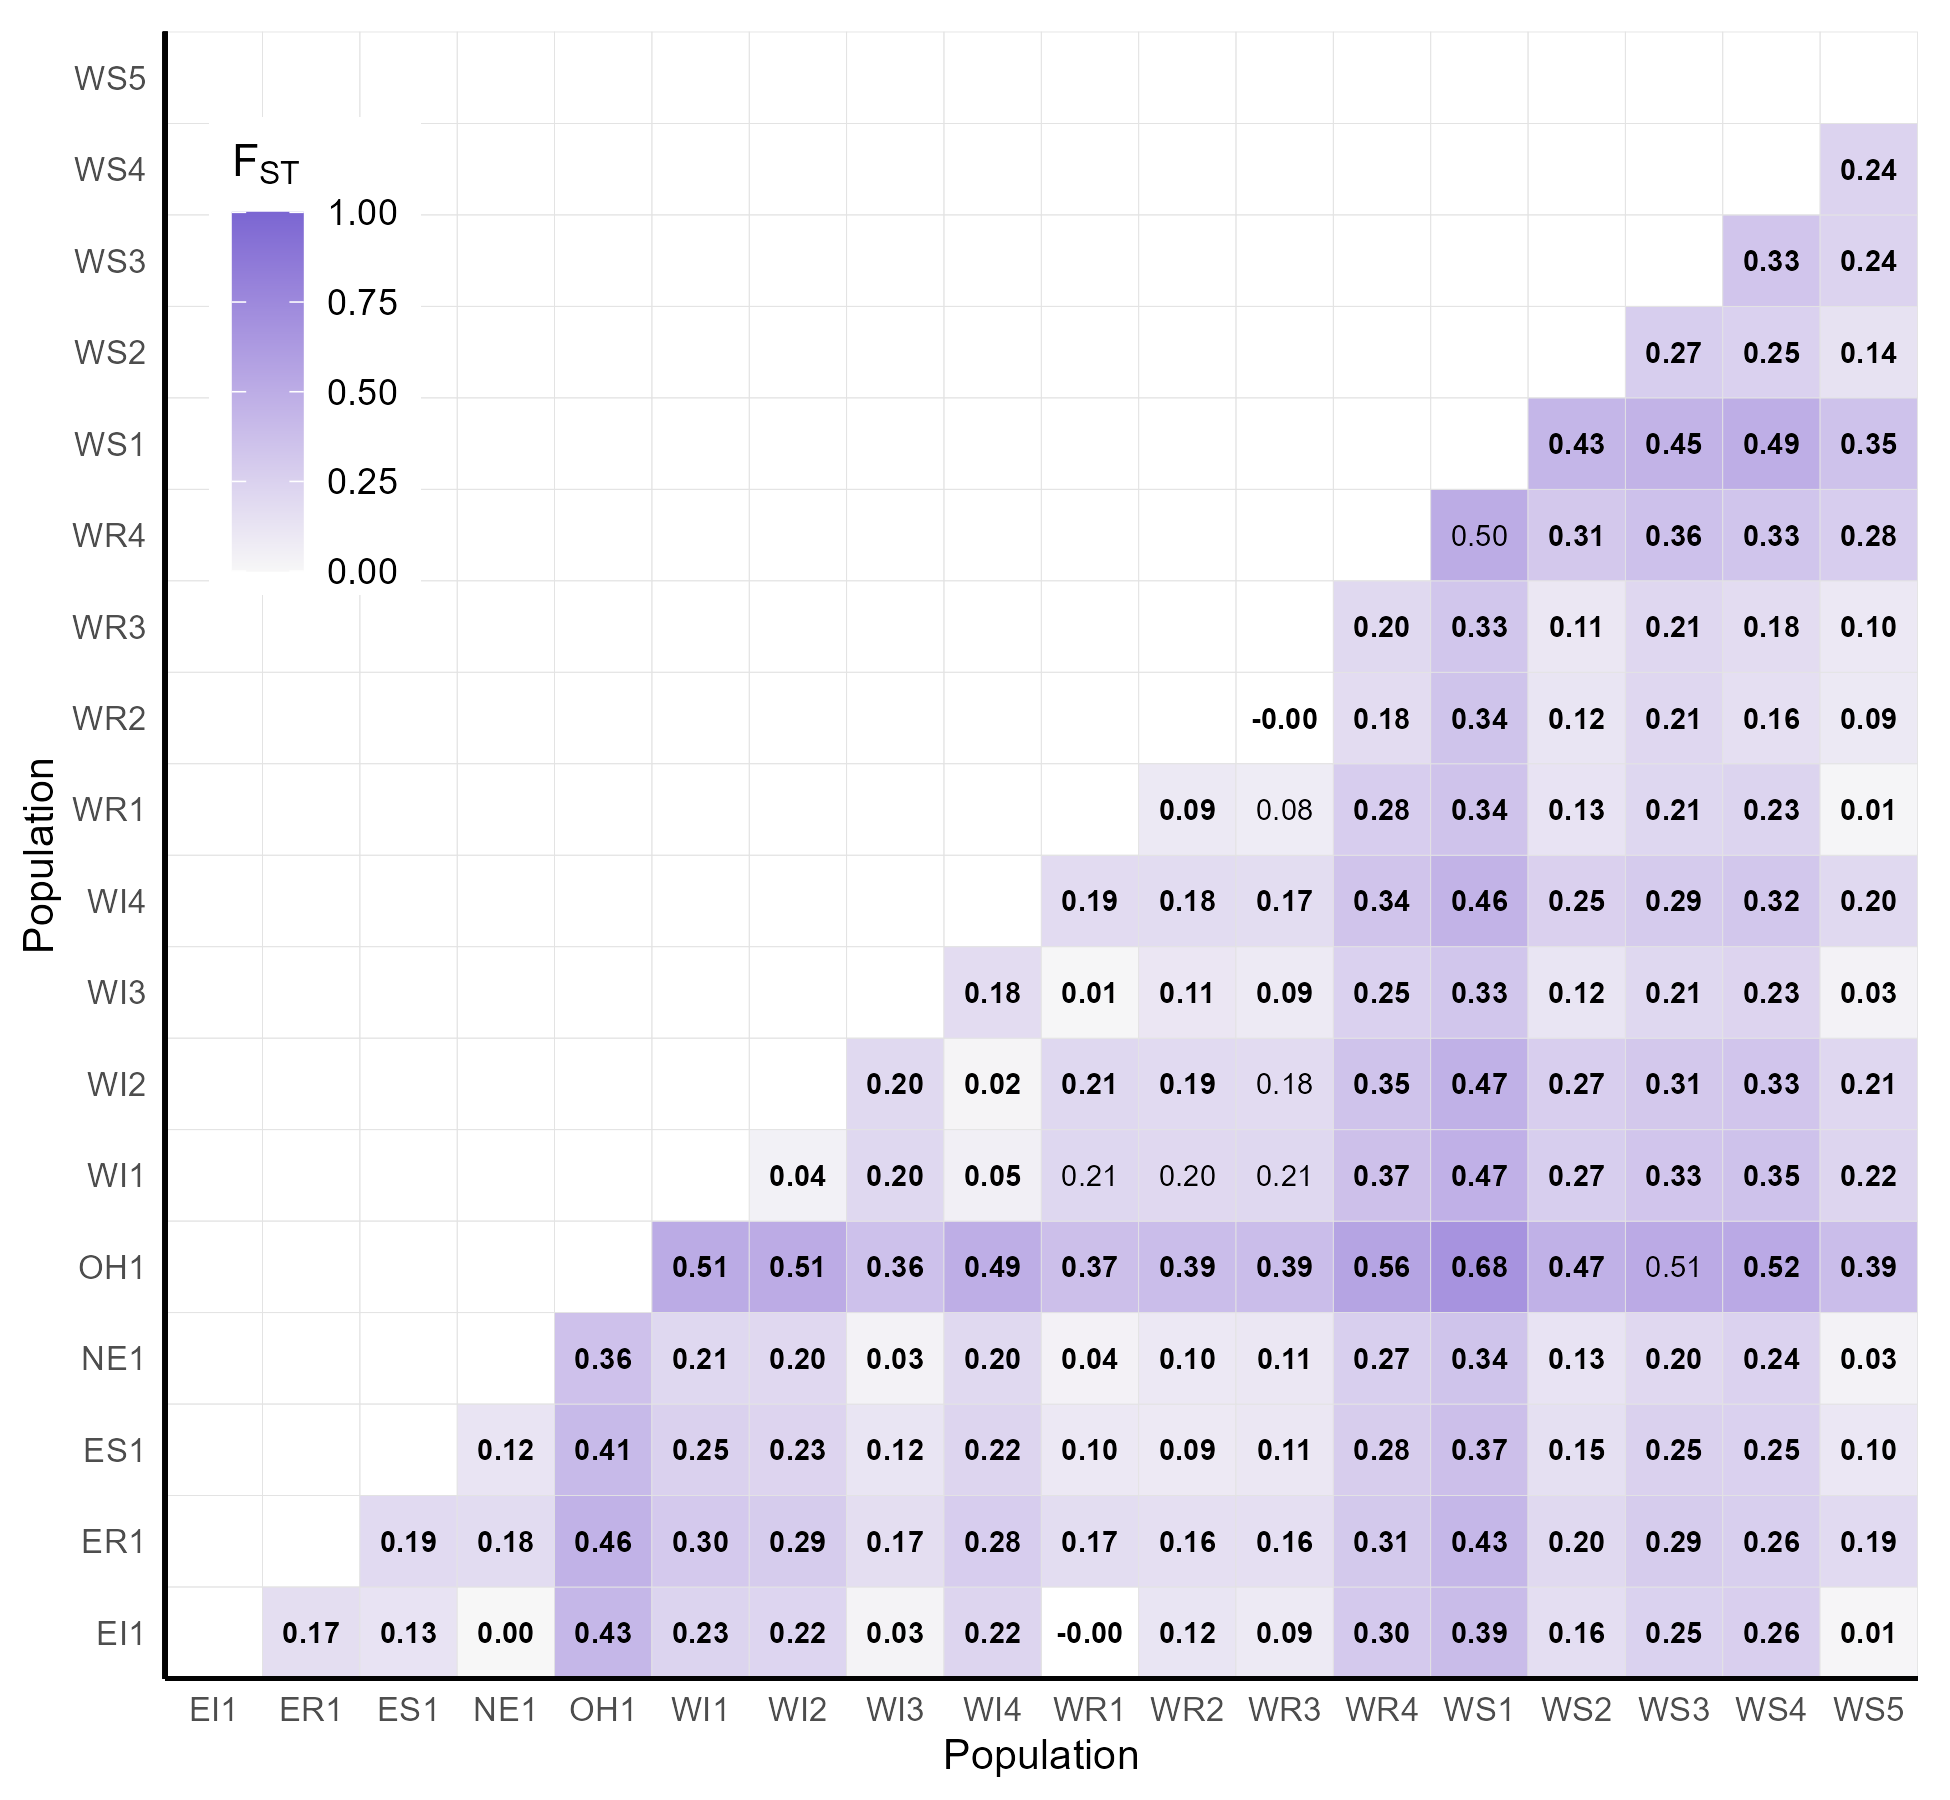  Figure S10. FST based on populations randomly subset to 2 samples each. Bold values are p<0.05 |
| --- |

| 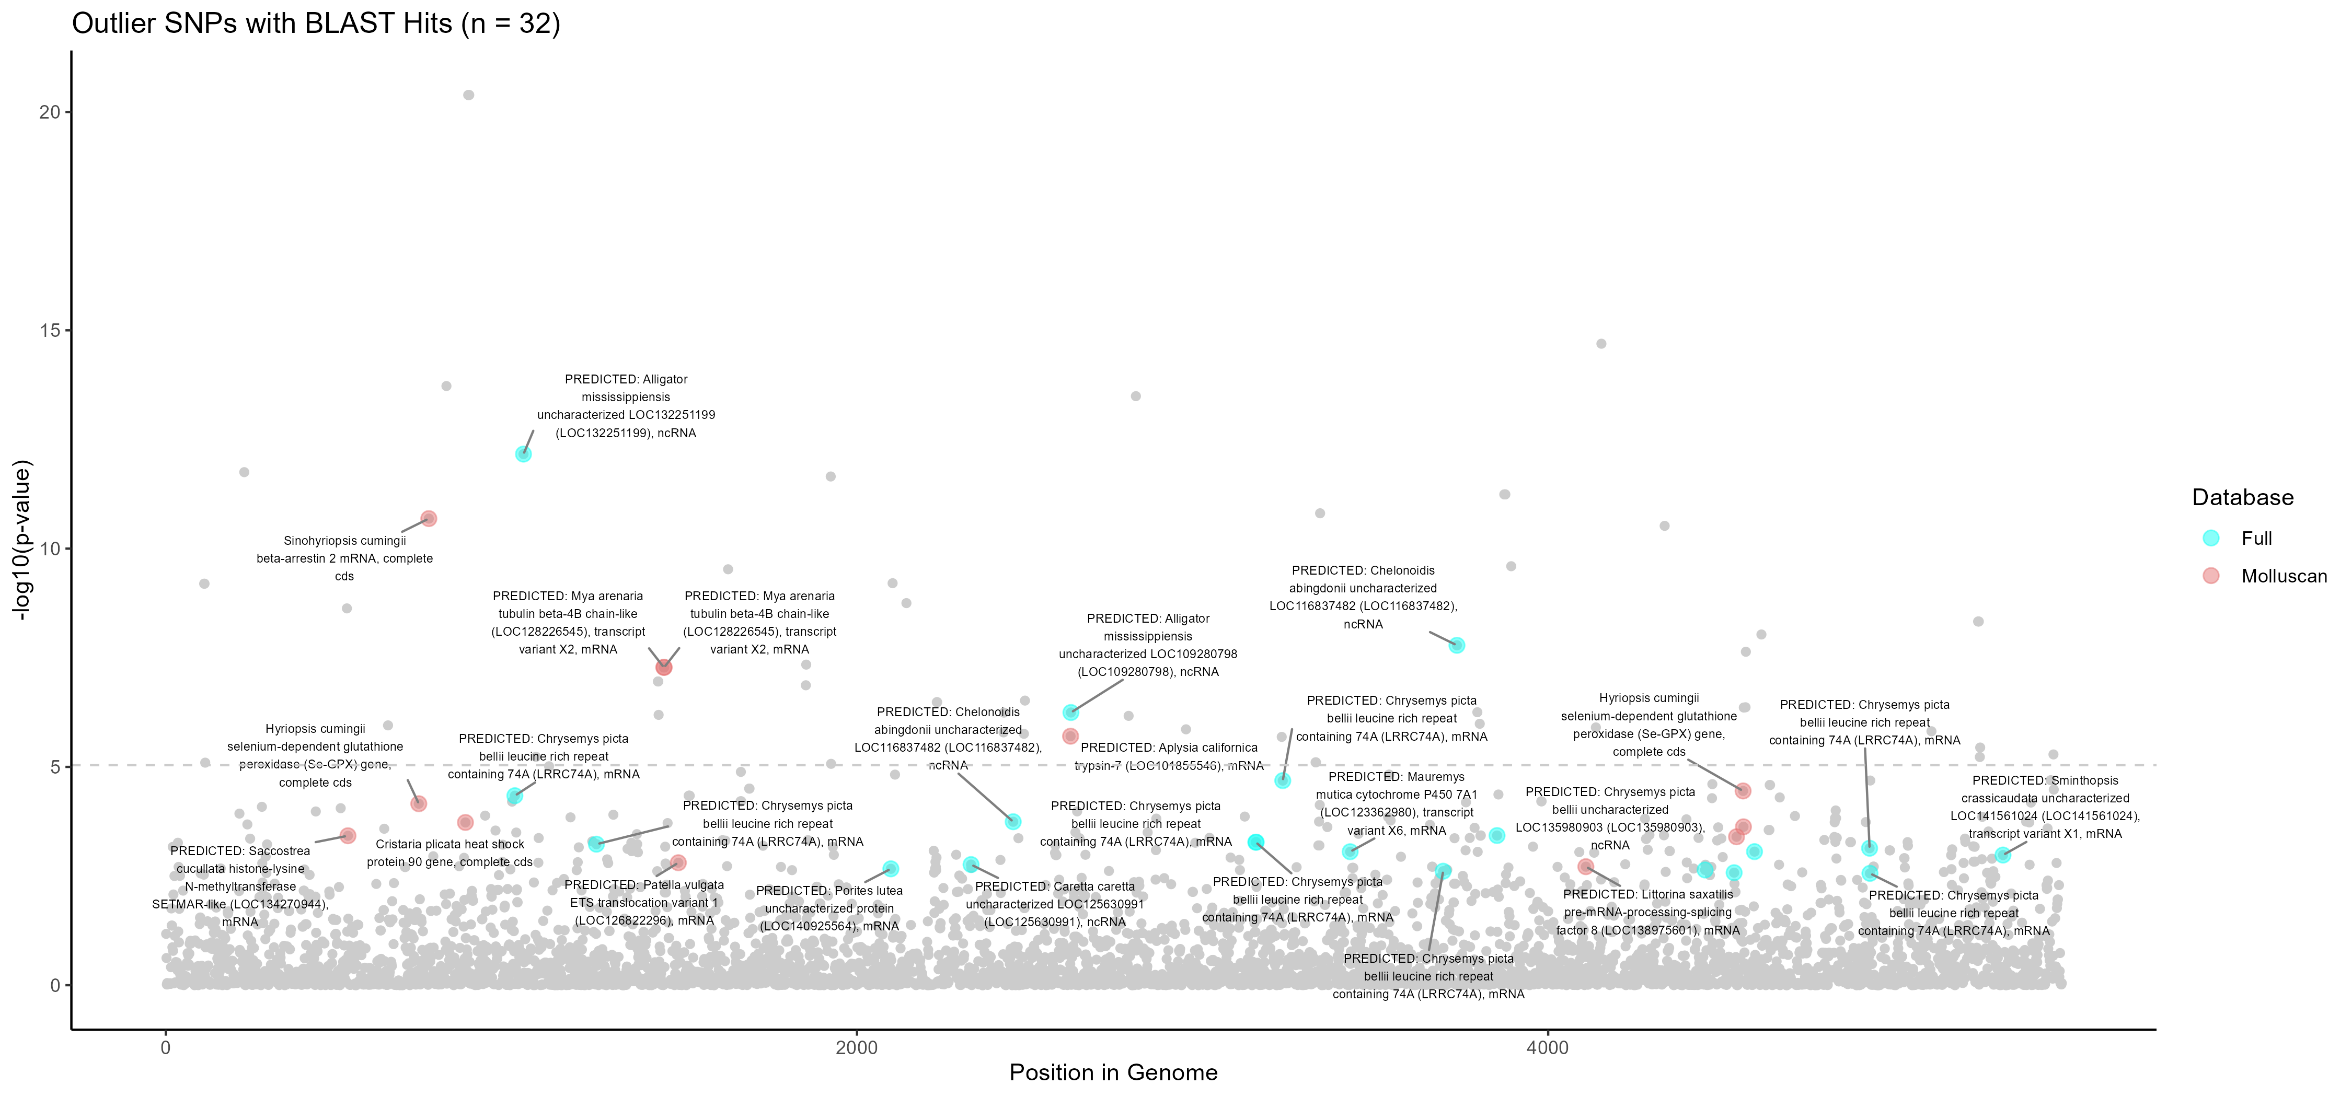  Figure S11. NCBI BLAST results of 1000bp flanks of outlier SNPs in the context of RDA p-values of all 5486 SNPs across 18 *M. margaritifera* populations. 32 of the 302 outlier SNPs had hits and of those, 12 were of molluscan origin. |
| --- |

Table S2. Filtered BLAST hits (E-value ≤ 1e‑5) for 302 RDA outlier SNPs in *Margaritifera margaritifera*. For each SNP, the top match was retained based on shortest flank length (100/500/1000 bp, “Proximity”) and lowest E-value, with hits from the molluscan database versus the full NCBI nucleotide (nt) prioritised and identified by the “Database” column. Query_ID represents the SNP name its associated flanking region. *SNP* represents the SNP name in this dataset. *Subject_ID* provides the identifier for the matched sequence, including the GenInfo identifier, database source (e.g., RefSeq [ref] or GenBank [gb]), and the accession number. *Description* gives the matching sequence annotation, *E-value* represents the level of match with the search sequence. P_value is derived from RDA loadings using a Mahalanobis distance-based chi-squared test. Top predictor variable with the highest absolute Pearson correlation coefficient is listed in the *Predictor* column; corresponding absolute correlation value is shown in the *Correlation* column.

| **SNP** | **Query_ID** | **Subject_ID** | **Description** | **E_value** | **P-value** | **Predictor** | **Absolute correlation** | **Database** | **Proximity** |
| --- | --- | --- | --- | --- | --- | --- | --- | --- | --- |
| scaf1227_1036742_T | scaf1227_1036742_T::JAQPZY010001227.1:1036241-1037242 | gi|2669151899|ref|XM_062753214.1| | PREDICTED: Saccostrea cucullata histone-lysine N-methyltransferase SETMAR-like (LOC134270944), mRNA | 1.817e-11 | 0.000377 | Catchment Area | 0.273 | Molluscan | 500bp |
| scaf1666_676460_A | scaf1666_676460_A::JAQPZY010001666.1:675959-676960 | gi|333906199|gb|JF412718.1| | Hyriopsis cumingii selenium-dependent glutathione peroxidase (Se-GPX) gene, complete cds | 1.337e-47 | 6.972e-05 | Altitude | 0.527 | Molluscan | 500bp |
| scaf1666_7864421_T | scaf1666_7864421_T::JAQPZY010001666.1:7863920-7864921 | gi|1199278592|gb|KX824065.1| | Sinohyriopsis cumingii beta-arrestin 2 mRNA, complete cds | 1.766e-31 | 2.054e-11 | BIOCLIM5 | 0.428 | Molluscan | 500bp |
| scaf1582_2585350_A | scaf1582_2585350_A::JAQPZY010001582.1:2584849-2585850 | gi|595094254|gb|KF997091.1| | Cristaria plicata heat shock protein 90 gene, complete cds | 1.395e-17 | 0.000187 | BIOCLIM3 | 0.253 | Molluscan | 500bp |
| scaf1264_1189805_A | scaf1264_1189805_A::JAQPZY010001264.1:1189304-1190305 | gi|2739719310|ref|XM_008164907.4| | PREDICTED: Chrysemys picta bellii leucine rich repeat containing 74A (LRRC74A), mRNA | 1.218e-164 | 4.569e-05 | BIOCLIM3 | 0.298 | Full | 500bp |
| scaf1279_1348607_C | scaf1279_1348607_C::JAQPZY010001279.1:1348106-1349107 | gi|2580404678|ref|XR_009463094.1| | PREDICTED: Alligator mississippiensis uncharacterized LOC132251199 (LOC132251199), ncRNA | 3.484e-145 | 6.844e-13 | BIOCLIM3 | 0.313 | Full | 500bp |
| scaf1646_2912875_G | scaf1646_2912875_G::JAQPZY010001646.1:2912374-2913375 | gi|2739719310|ref|XM_008164907.4| | PREDICTED: Chrysemys picta bellii leucine rich repeat containing 74A (LRRC74A), mRNA | 8.327e-72 | 0.00059 | Altitude | 0.477 | Full | 500bp |
| scaf1554_3485386_C | scaf1554_3485386_C::JAQPZY010001554.1:3485285-3485486 | gi|2427456052|ref|XM_052936480.1| | PREDICTED: Mya arenaria tubulin beta-4B chain-like (LOC128226545), transcript variant X2, mRNA | 1.448e-25 | 5.249e-08 | BIOCLIM3 | 0.332 | Molluscan | 100bp |
| scaf1554_3485425_T | scaf1554_3485425_T::JAQPZY010001554.1:3485324-3485525 | gi|2427456052|ref|XM_052936480.1| | PREDICTED: Mya arenaria tubulin beta-4B chain-like (LOC128226545), transcript variant X2, mRNA | 3.090e-32 | 5.249e-08 | BIOCLIM3 | 0.332 | Molluscan | 100bp |
| scaf1457_2574556_C | scaf1457_2574556_C::JAQPZY010001457.1:2574055-2575056 | gi|2506331227|ref|XM_050551096.2| | PREDICTED: Patella vulgata ETS translocation variant 1 (LOC126822296), mRNA | 6.352e-31 | 0.001566 | Elevation Range | 0.222 | Molluscan | 500bp |
| scaf1119_375430_G | scaf1119_375430_G::JAQPZY010001119.1:374429-376430 | gi|2960424137|ref|XM_073375497.1| | PREDICTED: Porites lutea uncharacterized protein (LOC140925564), mRNA | 1.817e-11 | 0.00216 | BIOCLIM17 | 0.173 | Full | 1000bp |
| scaf0933_662787_C | scaf0933_662787_C::JAQPZY010000933.1:662286-663287 | gi|2263229029|ref|XR_007354850.1| | PREDICTED: Caretta caretta uncharacterized LOC125630991 (LOC125630991), ncRNA | 1.496e-19 | 0.001726 | BIOCLIM3 | 0.384 | Full | 500bp |
| scaf1260_20211_T | scaf1260_20211_T::JAQPZY010001260.1:19710-20711 | gi|3018996564|ref|XR_004376704.2| | PREDICTED: Chelonoidis abingdonii uncharacterized LOC116837482 (LOC116837482), ncRNA | 1.307e-114 | 0.00018 | BIOCLIM3 | 0.471 | Full | 500bp |
| scaf1508_3148850_G | scaf1508_3148850_G::JAQPZY010001508.1:3147849-3149850 | gi|871214176|ref|XM_013079188.1| | PREDICTED: Aplysia californica trypsin-7 (LOC101855546), mRNA | 3.660e-31 | 1.981e-06 | BIOCLIM5 | 0.256 | Molluscan | 1000bp |
| scaf1508_3148961_T | scaf1508_3148961_T::JAQPZY010001508.1:3148860-3149061 | gi|2580385100|ref|XR_002087217.2| | PREDICTED: Alligator mississippiensis uncharacterized LOC109280798 (LOC109280798), ncRNA | 6.927e-41 | 5.68e-07 | BIOCLIM5 | 0.255 | Full | 100bp |
| scaf1671_8070694_G | scaf1671_8070694_G::JAQPZY010001671.1:8070193-8071194 | gi|2739719310|ref|XM_008164907.4| | PREDICTED: Chrysemys picta bellii leucine rich repeat containing 74A (LRRC74A), mRNA | 0.000e+00 | 0.000531 | Catchment Area | 0.215 | Full | 500bp |
| scaf1671_8070714_C | scaf1671_8070714_C::JAQPZY010001671.1:8070213-8071214 | gi|2739719310|ref|XM_008164907.4| | PREDICTED: Chrysemys picta bellii leucine rich repeat containing 74A (LRRC74A), mRNA | 0.000e+00 | 0.000531 | Catchment Area | 0.215 | Full | 500bp |
| scaf1377_1110708_A | scaf1377_1110708_A::JAQPZY010001377.1:1110207-1111208 | gi|2739719310|ref|XM_008164907.4| | PREDICTED: Chrysemys picta bellii leucine rich repeat containing 74A (LRRC74A), mRNA | 0.000e+00 | 2.062e-05 | Wildness Index | 0.27 | Full | 500bp |
| scaf1293_672002_A | scaf1293_672002_A::JAQPZY010001293.1:671901-672102 | gi|2129504297|ref|XM_045003589.1| | PREDICTED: Mauremys mutica cytochrome P450 7A1 (LOC123362980), transcript variant X6, mRNA | 7.176e-16 | 0.000876 | BIOCLIM3 | 0.232 | Full | 100bp |
| scaf1389_703561_G | scaf1389_703561_G::JAQPZY010001389.1:703460-703661 | gi|2739719310|ref|XM_008164907.4| | PREDICTED: Chrysemys picta bellii leucine rich repeat containing 74A (LRRC74A), mRNA | 3.155e-54 | 0.00245 | Altitude | 0.433 | Full | 100bp |
| scaf0809_437852_T | scaf0809_437852_T::JAQPZY010000809.1:436851-438852 | gi|1820709337|ref|XR_004376704.1| | PREDICTED: Chelonoidis abingdonii uncharacterized LOC116837482 (LOC116837482), ncRNA | 7.987e-50 | 1.641e-08 | BIOCLIM5 | 0.229 | Full | 1000bp |
| scaf0948_472202_T | scaf0948_472202_T::JAQPZY010000948.1:471701-472702 | gi|2739616589|ref|XR_010597830.1| | PREDICTED: Chrysemys picta bellii uncharacterized LOC135980903 (LOC135980903), ncRNA | 7.436e-152 | 0.000373 | BIOCLIM5 | 0.26 | Full | 500bp |
| scaf1151_978085_G | scaf1151_978085_G::JAQPZY010001151.1:977084-979085 | gi|2868689553|ref|XM_070348318.1| | PREDICTED: Littorina saxatilis pre-mRNA-processing-splicing factor 8 (LOC138975601), mRNA | 9.893e-52 | 0.001928 | BIOCLIM3 | 0.425 | Molluscan | 1000bp |
| scaf1604_1600255_A | scaf1604_1600255_A::JAQPZY010001604.1:1599754-1600755 | gi|2739719310|ref|XM_008164907.4| | PREDICTED: Chrysemys picta bellii leucine rich repeat containing 74A (LRRC74A), mRNA | 3.363e-170 | 0.002294 | Elevation Range | 0.317 | Full | 500bp |
| scaf1556_3856035_A | scaf1556_3856035_A::JAQPZY010001556.1:3855534-3856535 | gi|2739719310|ref|XM_008164907.4| | PREDICTED: Chrysemys picta bellii leucine rich repeat containing 74A (LRRC74A), mRNA | 0.000e+00 | 0.002649 | BIOCLIM3 | 0.247 | Full | 500bp |
| scaf1609_5207798_G | scaf1609_5207798_G::JAQPZY010001609.1:5207297-5208298 | gi|333906199|gb|JF412718.1| | Hyriopsis cumingii selenium-dependent glutathione peroxidase (Se-GPX) gene, complete cds | 1.705e-56 | 0.000398 | BIOCLIM3 | 0.239 | Molluscan | 500bp |
| scaf1699_10054571_T | scaf1699_10054571_T::JAQPZY010001699.1:10053570-10055571 | gi|333906199|gb|JF412718.1| | Hyriopsis cumingii selenium-dependent glutathione peroxidase (Se-GPX) gene, complete cds | 1.262e-60 | 3.553e-05 | BIOCLIM3 | 0.237 | Molluscan | 1000bp |
| scaf1699_10054620_A | scaf1699_10054620_A::JAQPZY010001699.1:10053619-10055620 | gi|333906199|gb|JF412718.1| | Hyriopsis cumingii selenium-dependent glutathione peroxidase (Se-GPX) gene, complete cds | 1.262e-60 | 0.000236 | BIOCLIM3 | 0.212 | Molluscan | 1000bp |
| scaf1699_21205447_A | scaf1699_21205447_A::JAQPZY010001699.1:21204946-21205947 | gi|2739719310|ref|XM_008164907.4| | PREDICTED: Chrysemys picta bellii leucine rich repeat containing 74A (LRRC74A), mRNA | 0.000e+00 | 0.000872 | Catchment Area | 0.37 | Full | 500bp |
| scaf1504_2299173_A | scaf1504_2299173_A::JAQPZY010001504.1:2298172-2300173 | gi|2739719310|ref|XM_008164907.4| | PREDICTED: Chrysemys picta bellii leucine rich repeat containing 74A (LRRC74A), mRNA | 0.000e+00 | 0.000729 | Altitude | 0.202 | Full | 1000bp |
| scaf1504_2299177_A | scaf1504_2299177_A::JAQPZY010001504.1:2298176-2300177 | gi|2739719310|ref|XM_008164907.4| | PREDICTED: Chrysemys picta bellii leucine rich repeat containing 74A (LRRC74A), mRNA | 0.000e+00 | 0.002743 | Elevation Range | 0.189 | Full | 1000bp |
| scaf1669_2784911_T | scaf1669_2784911_T::JAQPZY010001669.1:2784410-2785411 | gi|2990512829|ref|XM_074299964.1| | PREDICTED: Sminthopsis crassicaudata uncharacterized LOC141561024 (LOC141561024), transcript variant X1, mRNA | 1.962e-08 | 0.001044 | Catchment Area | 0.197 | Full | 500bp |

Table S3. Comparative table using previous SNP-based studies. Data from Massachusetts comes from Farrington et al. (2020) and Iberian Peninsula comes from Perea et al. (2022)

| **Metric** | **Massachusetts** | **Iberian Peninsula** | **Scotland** |
| --- | --- | --- | --- |
| Sample size | 59 | 130 | 156 |
| Geographic sites | 6 | 26 | 18 |
| Number of SNPs used | 300 | 31,692 | 5,432 |
| Ancestral populations (K) | 1 | 3 | 9 |
| FST | 0.00-0.14 | 0.17-0.22 | 0.00-0.14 |
| HO (Observed Het.) | 0.161-0.266 | 0.045-0.066 | 0.050-0.267 |
| HE (Expected Het.) | 0.157-0.202 | 0.043-0.059 | 0.035-0.248 |
| Private alleles | None | 25-225 | 576-3161 |
| FIS (Inbreeding) | 0.322 | -0.015-0.004 | -0.047-0.262 |
| Isolation by distance | Absent | Present | Absent |
| Nucleotide diversity (π) | Not reported | 0.045-0.059 | 0.017-0.124 |
